# Supplementary material
Source: PubMed Central journal article supplement (PMC7544546)
Supplement: bloodBLD2019001279-suppl1.pdf [file bloodBLD2019001279-suppl1.pdf]

## **Lysine acetyltransferase Tip60 is required for hematopoietic stem cell maintenance**

Akihiko Numata,<sup>1,2\*</sup> Hui Si Kwok,<sup>1\*</sup> Qi-Ling Zhou,<sup>1\*</sup> Jia Li,<sup>1</sup> Roberto Tirado-Magallanes,<sup>1</sup> Vladimir Espinosa Angarcia,<sup>1</sup> Rebecca Hannah,<sup>3</sup> Jihye Park,<sup>4</sup> Chelsia Qiuxia Wang,<sup>1</sup> Vaidehi Krishnan,<sup>1</sup> Deepa Rajagopalan,<sup>1</sup> Yanzhou Zhang,<sup>1</sup> Siqin Zhou,<sup>1</sup> Robert S. Welner,<sup>5</sup> Motomi Osato,<sup>1</sup> Sudhakar Jha,<sup>1</sup> Stefan K. Bohlander,<sup>6</sup> Berthold Göttgens,<sup>3</sup> Henry Yang,<sup>1</sup> Touati Benoukraf,<sup>1,8</sup> John Lough,<sup>7</sup> Deepak Bararia,<sup>1,9\*\*</sup> and Daniel G. Tenen<sup>1,9\*\*</sup>

1. Cancer Science Institute of Singapore, National University of Singapore, Singapore
2. Medicine and Biosystemic Science, Kyushu University Graduate School of Medical Sciences, Fukuoka, Japan
3. Department of Haematology, Wellcome and Medical Research Council Cambridge Stem Cell Institute & Cambridge Institute for Medical Research, Cambridge University, Cambridge, UK
4. Department of Pathology, Beth Israel Deaconess Medical Center, Boston, USA
5. Hematology & Oncology, Department of Medicine, The University of Alabama at Birmingham, Comprehensive Cancer Center, Birmingham, USA
6. Leukaemia and Blood Cancer Research Unit, Department of Molecular Medicine and Pathology, University of Auckland, Auckland, New Zealand
7. Department of Cell Biology Neurobiology and Anatomy and the Cardiovascular Center, Medical College of Wisconsin, Milwaukee, USA
8. Department of Medicine, Memorial University of Newfoundland, St. John's, Canada
9. Harvard Stem Cell Institute, Harvard Medical School, Boston, USA

\* Co-first authors.

\*\* Corresponding authors.

### Supplemental information

1. Supplemental materials and methods
2. Supplemental figures and figure legends
3. References

## Supplemental materials and methods

### Mice

*Tip60<sup>f</sup>* mice are generated by inserting *LoxP* sites flanking introns 2 and 11 of the mouse *Tip60* gene. Cre-recombinase-mediated excision was designed to remove exons 3 to 11, which includes the chromo-finger, zinc finger, and acetyl Co-A binding domains. Embryonic stem cell clones with correct homologous recombination were injected into *C57/Bl6* blastocysts, which transmitted the targeted allele via germline following implantation. Germline chimeras were analyzed by Southern blotting using Probe (491 bp), which was generated by PCR with the following primers: Probe F 5' - CTG CCC TCA CCC CAA ACC TAC CAT C -3' and Probe R 5' AGG AAG CGG CAG ACG GGA AAC AGC G -3' (supplemental Figures 1A and 1B). The neomycin resistance cassette flanked by FRT recombination sites were removed by crossing with a mouse expressing a *Flp recombinase* transgene. The details were described before <sup>1</sup>. *Tip60<sup>f/+</sup>* mice were crossed to *Mx1-Cre*, *Vav-iCre* <sup>2</sup> and *Rosa26-CreERT2* strain for further experiments. *Mx1-Cre; Tip60<sup>f/f</sup>* mice and *Vav-iCre; Tip60<sup>f/+</sup>* were crossed to *Rosa26-stop-tdTomato* reporter mice (*Rosa-tdTomato*) to measure reporter activity which is reflective of *Tip60* deletion efficiency. CD45.1<sup>+</sup> congenic mice (*B6.SJL*) were crossed to *C57BL/6* mice to generate CD45.1<sup>+</sup>CD45.2<sup>+</sup> congenic mice. *B6.SJL*, *Rosa26-creERT2* and *Rosa-tdTomato* mice were purchased from Jackson Labs. Experiments were performed on 8-12 weeks old mice. All mice were housed in a sterile barrier facility within the Comparative Medicine facility at the National University of Singapore. All mice experiments performed in this study were approved by Institutional Animal Care and Use Committee.

### PCR

Tail DNA from embryos or mice were used for PCR with the following primer: For genotyping: gTip60-F 5' - TAC AAT GTG GCC TGC ATC TTG ACT-3' and gTip60-R 5' - TCC TTT ATT TCT GGC GGC TCT CC -3', which amplify a 188 bp *Tip60* allele band and a 274 bp *Tip60<sup>f</sup>* allele band. The *Mx1-Cre*, *Vav-iCre*, *Rosa26-CreERT2* and *Rosa-tdTomato* mice genotyping protocols are available from Jackson Labs. To measure *Tip60* genome abundance in genomic DNA, cells were sorted into lysis buffer and DNA was extracted using QIAamp DNA Micro Kit (Qiagen). The *Tip60<sup>f</sup>* allele specifically, Tip60flox-F 5' - TCA ACG ATC GCA CGG GAG G -3' and Tip60flox-R 5' - GAT CAT CTC CGT ACA ACT CGA G -3' were used. For reference, *36b4* gene was amplified using 36b4-F 5' - ACT GGT CTA GGA CCC GAG AAG -3' and 36b4-R 5' - TCA ATG GTG CCT CTG GAG ATT -3'. Real time PCR was performed using SYBR green detection reagent on a Sequence Detection System 7700 (Applied Biosystems). The abundance of *Tip60* gene normalized to *36b4* gene was calculated using the  $\Delta\Delta CT$  method. To measure *Tip60* mRNA, RNA was extracted using RNeasy kit (QIAGEN), reverse transcribed using the QuantiTech Reverse Transcription kit (QIAGEN), and quantitatively assessed using an ABI7500 (Applied Biosystem). For each sample, transcript levels of tested genes were normalized to  $\beta$ -actin using the delta CT method. The highest expression was arbitrarily set to 1 and expressions in the other samples were normalized to this value. All experiments were performed with three technical replicates. qRT-PCR was performed on cDNA using following primers: Tip60-F: 5' - GCC TGG ACG GAA GCG GAA ATC TAA T -3', Tip60-R: 5' - AAA CAC TTG GCC AGA AGA CAC AG -3',  $\beta$ -actin-F: 5' - GGT CCA CAC CCG CCA CCA G -3',  $\beta$ -actin-R: 5' - TTG CTC TGG GCC TCG TCA CC -3'. For ChIP-qPCR, PCR was carried out with GoTaq qPCR mastermix (Promega) and analysed with a Corbett Rotagene system. Relative enrichment is calculated over the intergenic control. The primers used are as follows: Ncl promo-ChIP-F: 5'-CCC AAC

TGC TTC CCA CTT TCT C-3', Ncl promo-ChIP-R: 5'-GTG GGG GAG TGT CTG TAG TAC C-3', Rps9 promo-ChIP-F: 5'-CGG GAA GAG TTA GGT AGC CAT G-3', Rps9 promo-ChIP-R: 5'-CTT GAC CCT CCA AAC CTC ACG-3', NC (control intergenic region) -ChIP-F: 5'-CCC TCA CAC AGC TGA AAT CGC-3', NC-ChIP-R: 5'-CCT GGC ACT GCA GAT GTA CTC-3'.

### Apoptosis assay

Cells stained for cell-surface markers were incubated with Annexin-V FITC antibody (BD Biosciences) according to the manufacturer's instructions. After washing, the cells were stained with DAPI (Invitrogen) and analyzed by LSRII flow cytometer.

### Cell-Cycle and DNA content analysis

Cells stained for cell-surface markers were fixed and permeabilized using fixing and permeabilization buffers (BD Biosciences), and stained with Ki-67-FITC antibody (BD Pharmingen) according to the manufacturer's instructions. After washing, the cells were incubated with DAPI (Invitrogen) or Hoechst 33258 (Invitrogen), and RNaseA, and then analyzed by LSRII flow cytometer.

### Cell lines

BOSC23 (ATCC, CRL11270) and HEK293T (ATCC, CRL3216) cells were maintained in DMEM (Biowest) supplemented with 10% heat-inactivated fetal bovine serum (FBS) (Biowest). MCF10A (ATCC, CRL10317) cells were cultured in DMEM/F12 medium supplemented with 5% horse serum and epithelial growth factor (EGF) (20 ng/ml), hydrocortisone (0.5 mg/ml), cholera toxin (100 ng/ml), insulin (10 µg/ml). HPC-7 cells<sup>3</sup> were grown in SCF, and 32D (DSMZ, AC441) cells were grown in murine IL-3 (10 ng/ml).

### Flow cytometry

Single-cell suspensions were analyzed by flow cytometry. Antibodies conjugated with phycoerythrin (PE), PE-CY7, fluorescein isothiocyanate (FITC), allophycocyanin (APC), APC-CY7, and Pacific Blue obtained from BD Pharmingen, BioLegend, and eBioscience were used. Dead cells were stained with PI, DAPI, or Fixable Viability Dye (eBioscience). Stained cells were analyzed with an LSRII flow cytometer (BD Biosciences) or sorted using a FACS Aria (BD Biosciences). Flow Jo 7.5 (Tree Star) was used for data acquisition and analysis.

| Antigen      | Specificity | Cat no.    | Company       | Clone    | Dilution | Fluorochrome |
|--------------|-------------|------------|---------------|----------|----------|--------------|
| CD11b (Mac1) | mouse       | 17-0112-82 | eBioscience   | M1/70    | 1:200    | APC          |
| CD11b (Mac1) | mouse       | 25-0112-82 | eBioscience   | M1/70    | 1:200    | PE-CY7       |
| Gr-1/Ly6G    | mouse       | 17-5931-81 | eBioscience   | RB6-8C5  | 1:200    | APC          |
| Gr-1/Ly6G    | mouse       | 25-5931-82 | eBioscience   | RB6-8C5  | 1:200    | PE-CY7       |
| CD3e         | mouse       | 25-0031-82 | eBioscience   | 145-2C11 | 1:200    | PE-CY7       |
| CD4          | mouse       | 25-0041-82 | eBioscience   | GK1.5    | 1:200    | PE-CY7       |
| CD8a         | mouse       | 25-0081-82 | eBioscience   | 53-6.7   | 1:200    | PE-CY7       |
| B220/CD45R   | mouse       | 553092     | BD Pharmingen | RA3-6B2  | 1:100    | APC          |

|                |       |            |               |              |       |              |
|----------------|-------|------------|---------------|--------------|-------|--------------|
| B220/CD45R     | mouse | 25-0452-82 | eBioscience   | RA3-6B2      | 1:100 | PE-CY7       |
| CD19           | mouse | 25-0193-82 | eBioscience   | 1D3          | 1:100 | PE-CY7       |
| Ter119         | mouse | 25-5921-82 | eBioscience   | TER-119      | 1:100 | PE-CY7       |
| NK1.1          | mouse | 25-5941-82 | eBioscience   | 145-2C11     | 1:200 | PE-CY7       |
| CD117/c-kit    | mouse | 553356     | BD Pharmingen | 2B8          | 1:100 | APC          |
| Sca-1/Ly-6A/E  | mouse | 560654     | BD Pharmingen | D7           | 1:100 | APC-CY7      |
| CD150 (SLAMF6) | mouse | 115904     | Biolegend     | TC15-12F12.2 | 1:100 | PE           |
| CD48           | mouse | 11-0481-82 | eBioscience   | HM48-1       | 1:100 | FITC         |
| CD48           | mouse | 25-0481-80 | eBioscience   | HM48-1       | 1:100 | PE-CY7       |
| CD34           | mouse | 553733     | BD Pharmingen | RAM34        | 1:50  | FITC         |
| CD16/32        | mouse | 553145     | BD Pharmingen | 2.4G2        | 1:100 | PE           |
| CD127/IL7Ra    | mouse | 11-1271-85 | eBioscience   | A7R34        | 1:100 | FITC         |
| CD135/Flt3     | mouse | 12-1351-81 | eBioscience   | A2F10        | 1:100 | PE           |
| CD45.1         | mouse | 110721     | Biolegend     | A20          | 1:200 | Pacific Blue |
| CD45.2         | mouse | 109805     | Biolegend     | 104          | 1:200 | FITC         |

### Chimerism analysis

Cells from peripheral blood were stained with anti-CD45.1 and CD45.2 antibodies after RBC lysis to distinguish donor-derived cells from the host cells, as well as lineage-specific antibodies Mac1, Gr1, B220, CD19, CD4 and CD8 to identify myeloid, B, and T lineages.

### Homing assay

Lineage negative cells were purified from *Tip60<sup>fl/fl</sup>* and *Tip60<sup>fl/fl</sup>; Mx1-Cre* mice 5 days after the first pIpC injection (300µg for 3 consecutive days) and were labeled with CellTrace™ CFSE (Invitrogen).  $1 \times 10^6$  cells were injected to lethally irradiated congenic mice and the number of transplanted CD150<sup>+</sup>CD48<sup>+</sup>LSK cells present in the BM was determined at 16 hours post-injection.

### Co-immunoprecipitation

For 32D,  $1 \times 10^7$  cells were washed once with ice-cold PBS and lysed in M-PER™ mammalian protein extraction reagent (Thermo Scientific) supplemented with 150 mM NaCl, 1 mM PMSF and EDTA-free cOmplete™ protease inhibitor cocktail (Roche) 48h after transduction. The lysate was incubated at 4°C with constant rotation for 10 minutes and followed by centrifugation at 14,000 x g for 10 min at 4°C. Supernatant was collected and protein concentration was quantified by Bradford assay (Biorad). For co-immunoprecipitation of FLAG-TIP60, 30 µl of anti-FLAG M2 magnetic beads (Sigma) was added to the sample and incubated at 4°C overnight with constant rotation. For co-immunoprecipitation of c-myc, 3 µg c-Myc antibody (Cell Signaling Technology, CST5605) was incubated with 30 µl protein A Dynabeads (Invitrogen) at 4°C with constant rotation for 4 hours, then beads-bound antibody was added to the sample and incubated at 4°C overnight with constant rotation. On the next day, beads-bound immunoprecipitates were washed twice with buffer WG (50 mM Tris, pH 8.0, 300 mM NaCl, 10 mM NaF, 1 mM EDTA, 1% Triton-X100, 0.2% Sarkosyl, 10% glycerol) supplemented with protease

inhibitor, and twice with buffer D (20 mM Tris, pH 8.0, 300 mM NaCl, 0.5 mM EDTA, 10% glycerol, 0.5% NP-40) supplemented with protease inhibitor. For MCF10A,  $2 \times 10^7$  cells were lysed in M-PER™ mammalian protein extraction reagent (Thermo Scientific) supplemented with 1 mM PMSF and EDTA-free cOmplete™ protease inhibitor cocktail (Roche) 48h after transduction. Protein concentration was quantified, and 2 mg lysates were used for co-immunoprecipitation of FLAG-tagged Tip60. The antibody-lysate mixture was incubated at 4°C overnight with constant rotation and then washed thrice in wash buffer (20 mM Tris, pH 8.0, 300 mM NaCl, 0.5 mM EDTA, 10% glycerol, 0.5% NP-40). Proteins were eluted from the beads with Laemmli sample buffer and analyzed with Western blotting or mass spectrometry.

### **Western blotting**

$1 \times 10^6$  *Tip60<sup>fl/fl</sup>* and *Tip60<sup>Δ/Δ</sup>* FACS-sorted CD45<sup>+</sup> cells from fetal liver (E14.5), LSK cells from adult bone marrow, or 32D cells 48h after transduction were lysed in 100 μl of 1×Laemmli sample buffer and boiled at 95°C for 10 min. Proteins were separated on 10% SDS-PAGE gels. Immunoblots were incubated with primary antibody overnight at 4°C, followed by a secondary horseradish peroxidase (HRP)-conjugated antibody for 1h at room temperature. The antibodies used are caspase-3 (Cell Signaling Technology, CST9662), cleaved caspase-3 (Cell Signaling Technology, CST9661), FLAG M2 (Sigma, A8592), p400 (Santa Cruz, sc-66497), RVB1 and RVB2<sup>5</sup>, c-Myc (Cell Signaling Technology, CST5605), TIP60 (K-17) (Santa Cruz, sc-5727), TIP60 (N-17) (Santa Cruz, sc-5725), acetyl H2A.Z (abcam, ab18262), H2A.Z (abcam, ab4174), acH4K16 (MERCK, 07-329), histone 4 (H4) (Cell Signaling Technology, CST2592), acetyl-histone 3 (ac-H3) (Active Motif, 39139), histone 3, (H3) (Cell Signaling Technology, CST9715), and β-actin (C4) (Santa Cruz, sc-47778).

### **Chromatin immunoprecipitation**

Briefly, cells were fixed with 1% formaldehyde and then neutralized with glycine at a final concentration of 0.125M. Fixed chromatin were fragmented using a Bioruptor sonicator (Diagenode) at high power in a constantly circulating 4°C water bath to an average size of 500 base pairs. Sonicated chromatin was incubated with antibody overnight at 4°C. The antibodies used are Tip60<sup>6</sup>, H2A.Z (abcam, ab4174), acH2A.Z (abcam, ab18262), H3K27ac (abcam, ab4729), and H3K27me3 (CST, 9733BC). Protein A and Protein G Dynabeads (Life Technologies) were added to the mixture and incubated for 2 hours at 4°C. Antibody:chromatin complexes were collected with a magnet and washed two times with a solution of 50 mM HEPES-KOH, pH 7.6, 500 mM LiCl, 1 mM EDTA, 1% NP-40 and 0.7% Na-Deoxycholate. After a TE wash, samples were eluted, RNase and proteinase K treated and purified using a QIAGEN MinElute PCR purification kit. Pull-down DNA (2-10 ng) was used for library construction using ThruPLEX kits (Rubicon Genomics).

### **RNA/ChIP-sequencing**

RNA was isolated using RNeasy mini columns (Qiagen). RNA-seq libraries were prepared using Illumina Tru-Seq Stranded Total RNA with Ribo-Zero Gold kit protocol, according to the manufacturer's instructions (Illumina, San Diego, California, USA). Libraries were validated with an Agilent Bioanalyzer (Agilent Technologies, Palo Alto, CA), diluted and applied to an Illumina flow cell using the Illumina Cluster Station. ChIP-seq libraries were prepared using ThruPLEX kits (Rubicon

Genomics). Each library was sequenced on an Illumina HiSeq2000 sequencer at Duke-NUS Genome Biology Facility and Beijing Genomics Institute.

### **RNA-seq data analysis**

Raw reads were mapped to mouse genome assembly GRCm38 (mm10) with UCSC gene annotation using STAR. Raw gene expression was obtained with the FeatureCounts, normalization was performed and volcano plots were generated using the DESeq2. For identification of enriched gene sets or pathways, the mouse gene symbols converted to human equivalent homolog genes based on the annotation from Ensemble. Gene Set Enrichment Analysis (GSEA) was performed with the converted gene expression profiling information using the tool for preranked gene list (<http://www.broad.mit.edu/gsea/>).

### **ChIP-seq data analysis**

ChIP-seq reads for both pulldown and input were first aligned using the Burrows-Wheeler algorithm (BWA) to mm10. The mapped files were normalized to each other to extract bigwig files using BEDtools. The aligned ChIP-seq bam files were converted into tag directory using MakeTagDirectory function in HOMER, and subsequently ChIP-seq signal was calculated on proximal promoter region of each gene using annotatePeaks.pl function in HOMER with -hist -ghist setting. Promoter region was defined as from -1 kb to +100 bp from transcription start site (TSS). Active promoter was identified as promoter region overlapping H3K27ac peak. Distal Tip60-bound regions were defined as Tip60 peaks annotated as "intergenic" which is the category that encompasses the peaks that do not fall into the TSS, TTS, exons (CDS), 5'UTR, 3'UTR, CpG islands, repeats, or introns categories using HOMER. acH2A.Z/H2A.Z ratio was calculated based on the output in R program. ChIP-seq heatmap was generated from the aligned bam files using ngs.plot. The cloud plots and scatter plot were generated using R package.

### **Comet assay**

DNA damage was measured using the CometAssay Kit (Trevigen). *Tip60<sup>fl/+</sup>*, *Tip60<sup>fl/fl</sup>*, or *Tip60<sup>Δ/Δ</sup>* LSK cells from fetal liver or CD150<sup>+</sup>CD48<sup>-</sup> LSK cells from adult bone marrow were purified and suspended in PBS at a concentration of  $1 \times 10^5$  cells/ml. 50  $\mu$ l of cell suspension was mixed with 450  $\mu$ l of molten Comet LM agarose and spread onto coated microscope slides. After the agarose solidified, cells were lysed in Lysis Solution for 1 hour at 4°C. Slides were then incubated in Alkaline Unwinding Solution, pH > 13 for 1 hour at 4°C. Electrophoresis was carried out with pre-chilled Alkaline Electrophoresis Solution at 21 V for 25 min. Comets were visualized using 1 $\times$ SYBR Gold under epifluorescence microscopy examination (Nikon). Images were analyzed using NIH Image J program. DNA damage was determined by the tail moment and quantified for at least 60 cells from each experimental group. The tail moment is defined as the product of the tail length and the tail DNA percentage of the total DNA. Gamma-irradiated mouse whole bone marrow cells (300 rads) were used as positive control.

### **Immunofluorescence staining**

CD150<sup>+</sup>CD48<sup>-</sup> LSK cells were sorted onto Poly-L-Lysine-coated glass slides (Matsunami Glass Industry) by FACS Aria, fixed, and permeabilized. Immunofluorescence staining was performed using  $\gamma$ -H2AX (Millipore, JBW301) antibody, and

counterstained with DAPI to detect nuclei. Images were acquired on Zeiss LSM510 Meta Upright Confocal Microscopy ( $\times 63$  objectives). An average of 40 cells were scored from three independent experiments (n=3).

### **Mass spectrometry analysis**

Quadruplicate IP samples for each condition were separated on a 12% NuPAGE Bis-Tris precast gel (Thermo Fisher Scientific) for 310 min at 170 V in MOPS buffer. The gel was fixed using the Colloidal Blue Staining Kit (Thermo Fisher Scientific) and each sample as a single piece. For in-gel digestion prior to MS analysis, samples were destained in destaining buffer (25 mM ammonium bicarbonate, 50% ethanol) and reduced in 10 mM DTT for 1 hour at 56 °C followed by alkylation with 55 mM iodoacetamide (Sigma) for 45 min in the dark. Tryptic digest was performed in 50 mM ammonium bicarbonate buffer with 2  $\mu$ g trypsin (Promega) at 37 °C overnight. Peptides were desalted on StageTips and analysed by nanoflow liquid chromatography on an EASY-nLC 1200 system coupled to a Q Exactive HF Quadrupole-Orbitrap mass spectrometer (Thermo Fisher Scientific). Peptides were separated on a C18-reversed phase column (25 cm long, 75  $\mu$ m inner diameter) packed in-house with ReproSil-Pur C18-QAQ 1.9  $\mu$ m resin (Dr Maisch). The column was mounted on an Easy Flex Nano Source and temperature controlled by a column oven (Sonation) at 40 °C. A 105-min gradient from 2 to 40% acetonitrile in 0.5% formic acid at a flow of 225 nl/min was used. Spray voltage was set to 2.2 kV. The Q Exactive HF was operated with a TOP20 MS/MS spectra acquisition method per MS full scan. MS scans were conducted with 60,000 at a maximum injection time of 20 ms and MS/MS scans with 15,000 resolution at a maximum injection time of 50 ms. The raw MS files were processed with MaxQuant version 1.5.2.8 using the LFQ quantitation option on unique peptides with at least 2 ratio counts with the 'match between runs' option activated. Quantification providing LFQ intensities was performed on unique peptides only. Carbamidomethylation was set as fixed modification while methionine oxidation and protein N-acetylation were considered as variable modifications. Search results were filtered with a false discovery rate of 0.01. The resulting protein groups table was further processed with an in-house script to exclude contaminants (based on the MaxQuant contaminant list), reverse hits and proteins that were only identified by a modified peptide. Missing values were imputed based on normally distributed values corresponding to the percentage of missing values in each sample for proteins that were quantified in at least 3 out of 4 replicates in at least one biological condition.

### **Statistical analysis**

The statistical significances were assessed by Student's t-test using the GraphPad software unless otherwise specified.

**A**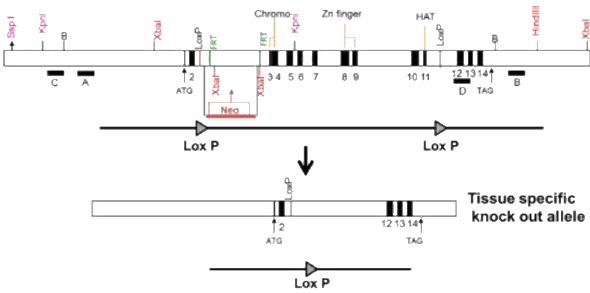**B**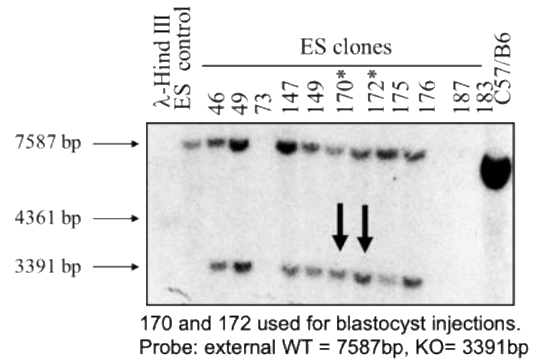

### Supplemental Figure 1 | Generation of *Tip60* conditional knockout mice.

**A**, Cre-recombinase-mediated excision was designed to remove exons 3–11, including the chromo-finger, zinc finger, and acetyl-CoA binding domains, by recombineering wherein LoxP sites were inserted into introns 2 and 11 of *Tip60*. **B**, Correctly targeted embryonic stem cells were injected into C57/B16 blastocysts, which, after implantation, transmitted the targeted allele via germline. Correct targeting was verified by external probe. *HindIII* and *PacI* double digestion resulted in 7587 bp for wild type allele and 3391 bp for correctly targeted allele. Following verification of targeting via Southern blotting and removal of the neomycin-resistance gene, mice were bred to the genotypes that were used in the experiments.





## Supplemental Figure 2 | *Tip60* loss leads to fetal hematopoietic failure.

**A**, Expression of Tomato in CD45<sup>+</sup>, LK (Lin<sup>-</sup>c-Kit<sup>+</sup>Sca-1<sup>-</sup>), and LSK (Lin<sup>-</sup>c-Kit<sup>+</sup>Sca-1<sup>+</sup>) cells from fetal liver of *Tip60*<sup>f/+</sup>; *Rosa26-tdTomato* and *Tip60*<sup>ff</sup>; *Vav-iCre*; *Rosa26-tdTomato* embryo at E14.5. **B**, The efficiency of *Tip60* gene ablation was analyzed by quantitative genomic PCR in fetal LSK, Lin<sup>-</sup>, and Lin<sup>+</sup> cells. The abundance of *Tip60* gene normalized to 36B4 gene was calculated using the  $\Delta\Delta$ CT method. Relative values of *Tip60*<sup>ff</sup>; *Vav-iCre* to control (*Tip60*<sup>f/+</sup> whole bone marrow cells) are shown (n=4). **C**, *Tip60* protein levels of CD45<sup>+</sup> cells of *Tip60*<sup>ff</sup> and *Tip60*<sup>ff</sup>; *Vav-iCre* embryos were analyzed by Western blotting. **D**, Absolute numbers of mature erythroid (Ter119<sup>+</sup>) per fetal liver from control (*Tip60*<sup>f/+</sup>) and *Tip60*<sup>A/A</sup> (*Tip60*<sup>ff</sup>; *Vav-iCre*) embryos at E14.5 and E17.5 are shown. **E**, Representative images of control and *Tip60*<sup>A/A</sup> fetal liver at E14.5. **F**, 1×10<sup>6</sup> whole fetal liver cells from control, *Tip60*<sup>+/-A</sup> (*Tip60*<sup>f/+</sup>; *Vav-iCre*), and *Tip60*<sup>A/A</sup> embryos at E14.5 were transplanted into lethally irradiated congenic mice (CD45.1<sup>+</sup>) along with 1×10<sup>5</sup> congenic whole bone marrow (WBM) cells (CD45.1<sup>+</sup>CD45.2<sup>+</sup>). Top, cartoons showing a chimerism analysis of the recipients' peripheral blood (PB) by flow cytometry. When staining for CD45.1 and CD45.2, CD45.1 and CD45.2 double positive cells are recipient-derived cells (R). CD45.2 only positive cells are donor-derived cells (D), while CD45.1 only positive cells are competitor-derived cells (C). When staining for B220/CD4-CD8 and Mac1-Gr1/B220, the double positive population is B220<sup>+</sup> B lineage cells (B). CD4-CD8 only positive are T lineage cells (T), while Mac1-Gr1 only positive cells are from the myeloid lineage (M). Bottom, representative flow cytometry dot plots for identification of donor cell, myeloid, B and T cell of the recipients' PB of *Tip60*<sup>f/+</sup>, *Tip60*<sup>+/-A</sup>, and *Tip60*<sup>A/A</sup> 16 weeks after transplantation. Percentages of the gated populations are shown. **G**, Donor chimerism in each lineage cells of the recipients' PB. The values are presented as mean ± SEM. Statistical analyses were performed against *Tip60*<sup>f/+</sup>. \*p < 0.05, \*\*\*p < 0.001.

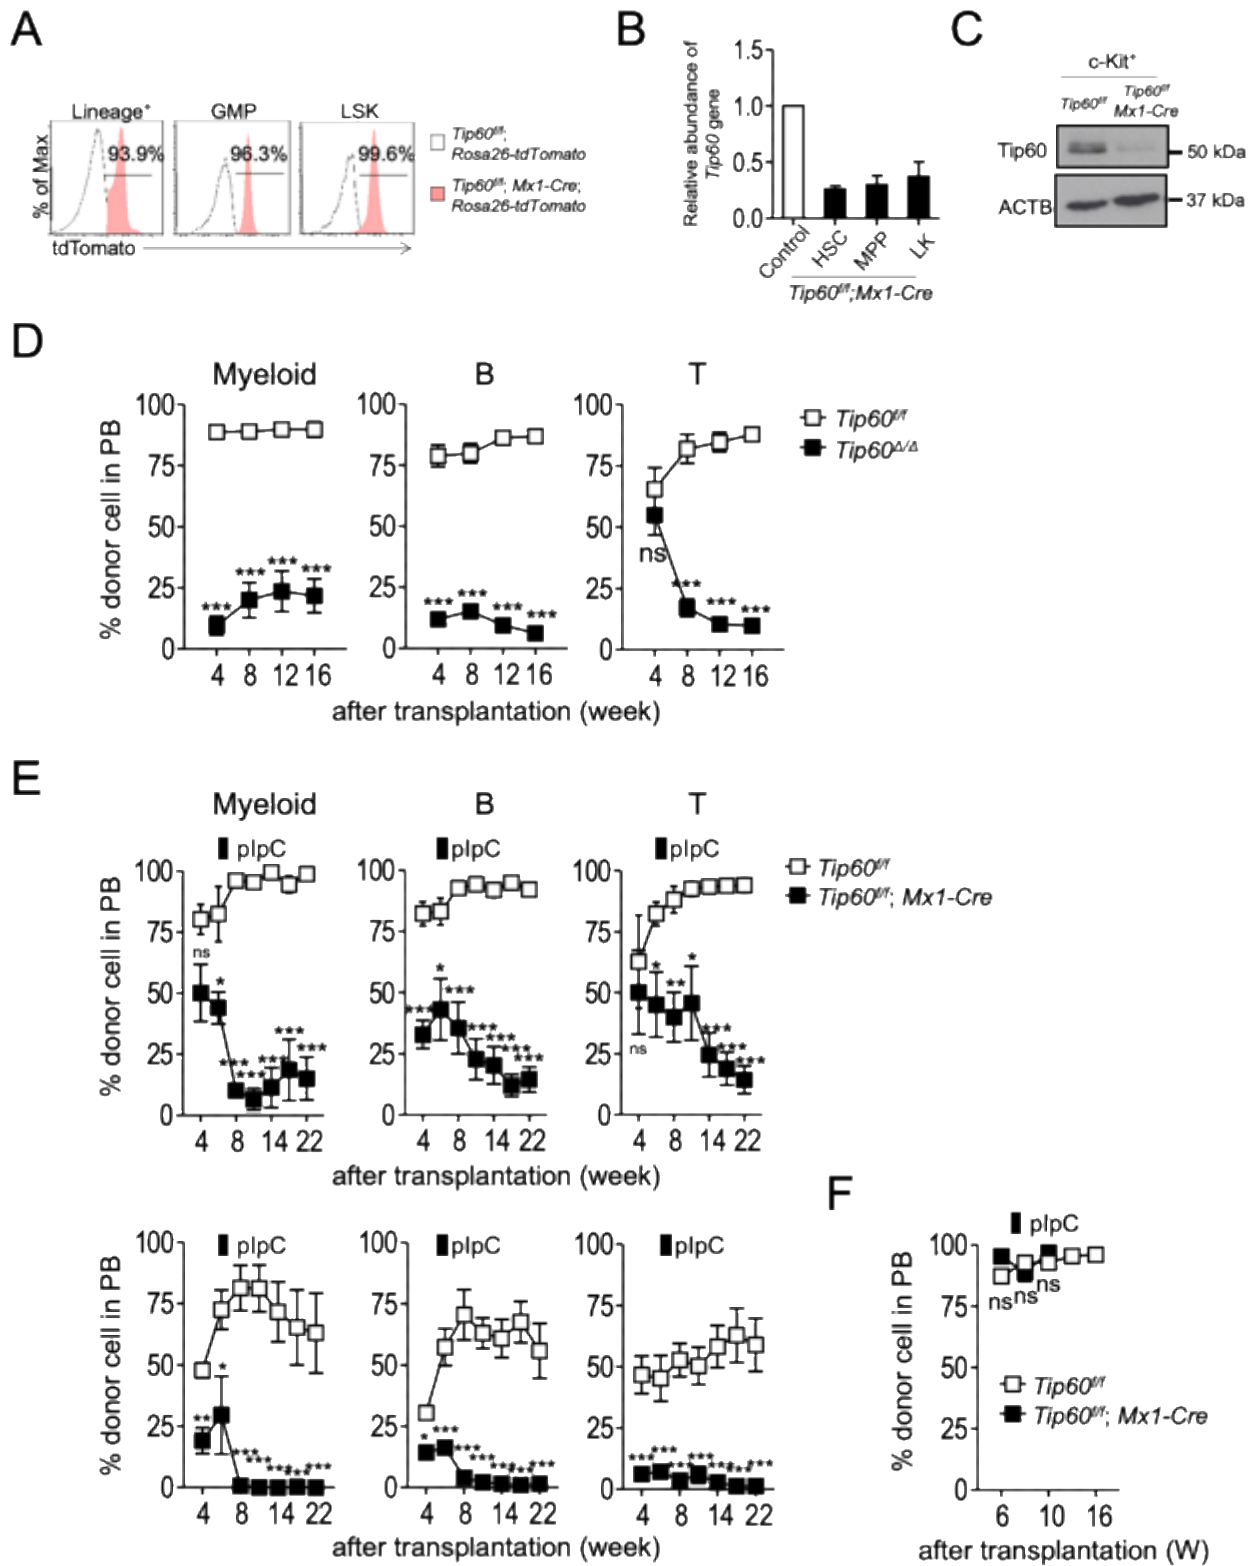

Supplemental Figure 3 | Tip60 is required for adult HSC maintenance in a cell-intrinsic manner.

**A**, Expression of Tomato in Lineage<sup>+</sup>, GMP, and LSK cells from of bone marrow (BM) of *Tip60<sup>fl/fl</sup>; Rosa26-tdTomato* and *Tip60<sup>fl/fl</sup>; Mx1-Cre; Rosa26-tdTomato* mice. The mice were injected with pIpC for 3 consecutive days and analyzed 5 days after the first injection. **B**, Efficiency of *Tip60* ablation was assessed by quantitative genomic PCR in BM HSC (CD150<sup>+</sup>CD48<sup>-</sup>LSK), MPP (CD150<sup>-</sup>CD48<sup>+</sup>LSK), and LK (Lin<sup>-</sup>c-Kit<sup>+</sup>Sca-1<sup>-</sup>) cells 5 days after the first pIpC injection. The abundance of *Tip60* gene normalized to 36B4 gene was calculated using the  $\Delta\Delta$ CT method. Relative values of *Tip60<sup>fl/fl</sup>; Mx1-Cre* to control (*Tip60<sup>fl/fl</sup>* WBM cells) are shown (n=4). **C**, *Tip60* protein levels of BM c-Kit<sup>+</sup> cells purified from *Tip60<sup>fl/fl</sup>* and *Tip60<sup>fl/fl</sup>; Mx1-Cre* mice 5 days after the last of the pIpC injections for three consecutive days were analyzed by Western blotting. **D**,  $1 \times 10^6$  WBM cells from control (*Tip60<sup>fl/fl</sup>*) and *Tip60<sup>Δ/Δ</sup>* mice were transplanted into lethally irradiated recipient mice along with  $2 \times 10^5$  congenic WBM cells. Donor chimerism in myeloid, B and T cells of the recipients' PB are shown. **E**, The upper panels,  $1 \times 10^6$  WBM cells from *Tip60<sup>fl/fl</sup>* or *Tip60<sup>fl/fl</sup>; Mx1-Cre* mice (CD45.2<sup>+</sup>) were transplanted into lethally irradiated recipient mice (CD45.1<sup>+</sup>) along with  $2 \times 10^5$  congenic WBM cells (CD45.1<sup>+</sup>CD45.2<sup>+</sup>). The lower panels,  $5 \times 10^5$  WBM cells from *Tip60<sup>fl/fl</sup>* or *Tip60<sup>fl/fl</sup>; Mx1-Cre* mice (CD45.2<sup>+</sup>) were transplanted into lethally irradiated recipient mice (CD45.1<sup>+</sup>) along with  $5 \times 10^5$  congenic WBM cells (CD45.1<sup>+</sup>CD45.2<sup>+</sup>). pIpC was injected to the recipients 6 weeks after the transplantation. Donor chimerism in each lineage cells of the recipients' PB are shown. **F**, Control (*Tip60<sup>fl/fl</sup>*) and *Tip60<sup>fl/fl</sup>; Mx1-Cre* mice were irradiated lethally and transplanted with  $1 \times 10^6$  congenic normal WBM cells. pIpC was injected into the recipients 6 weeks after the transplantation. Donor chimerism of the recipients' PB are shown. The values are presented as mean  $\pm$  SEM. \*p < 0.05, \*\*p < 0.01, \*\*\*p < 0.001, ns; not significant.

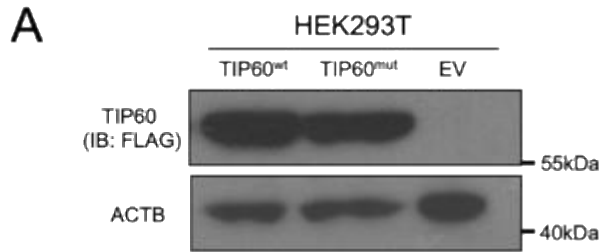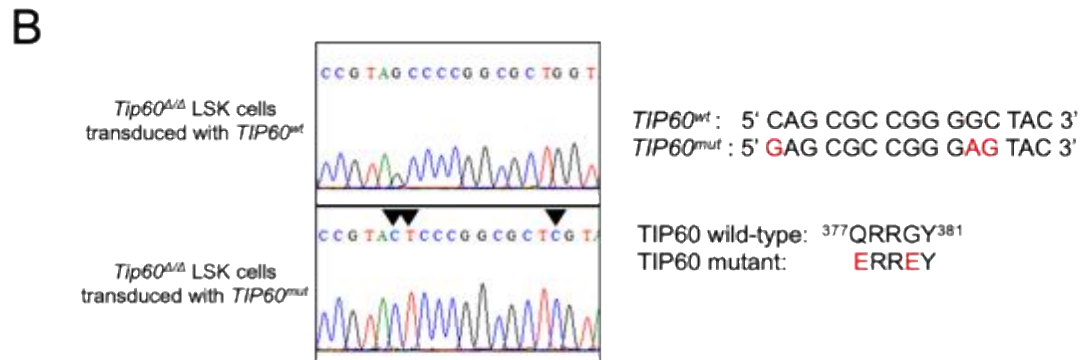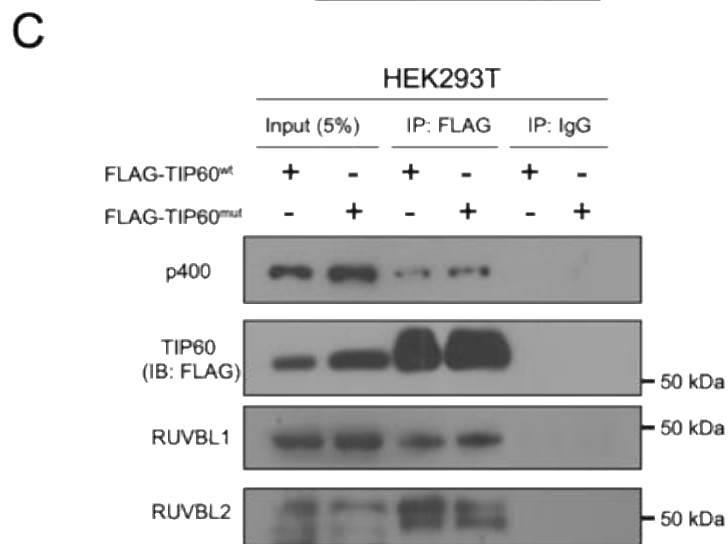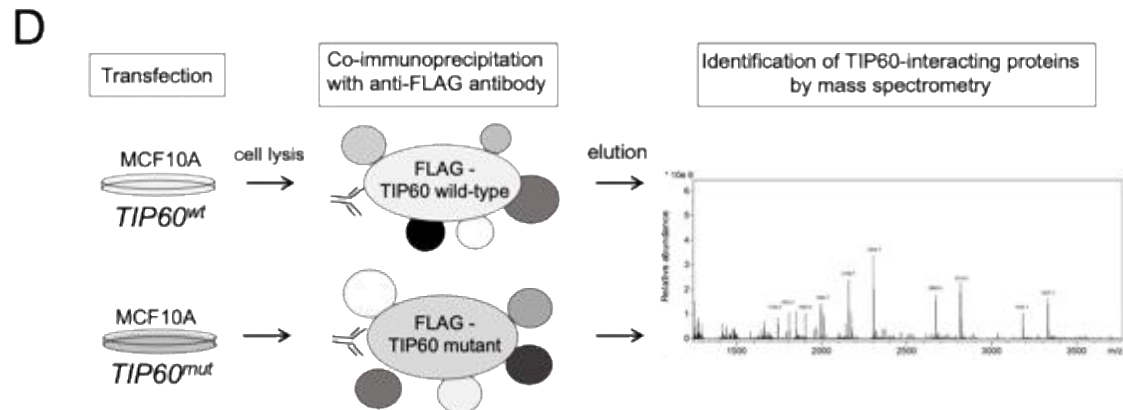

E

| Gene names   | Protein names                                          | Mol. weight [kDa] |
|--------------|--------------------------------------------------------|-------------------|
| KAT5 (TIP60) | Histone acetyltransferase KAT5 (TIP60)                 | 53.076            |
| ACTR2        | Actin-related protein 2                                | 44.76             |
| CECR5        | Cat eye syndrome critical region protein 5             | 43.588            |
| EP400        | E1A-binding protein p400                               | 335.8             |
| H2AFV;H2AFZ  | Histone H2A.V;Histone H2A.Z;Histone H2A                | 13.509            |
| HDAC2        | Histone deacetylase 2                                  | 51.998            |
| HIST1H2B     | Histone H2B                                            | 18.804            |
| HIST1H4A     | Histone H4                                             | 11.367            |
| HSPA8        | Heat shock cognate 71 kDa protein                      | 70.897            |
| LAMC2        | Laminin subunit gamma-2                                | 130.97            |
| LIMA1;TRMT1  | LIM domain and actin-binding protein 1                 | 85.225            |
| PPHLN1       | Periphilin-1                                           | 44.682            |
| RCN2         | Reticulocalbin-2                                       | 36.876            |
| RPL36A       | 60S ribosomal protein L36a                             | 12.469            |
| RPL6         | 60S ribosomal protein L6                               | 32.728            |
| TRIM28       | Transcription intermediary factor 1-beta               | 88.549            |
| TRRAP        | Transformation/transcription domain-associated protein | 436.13            |

F

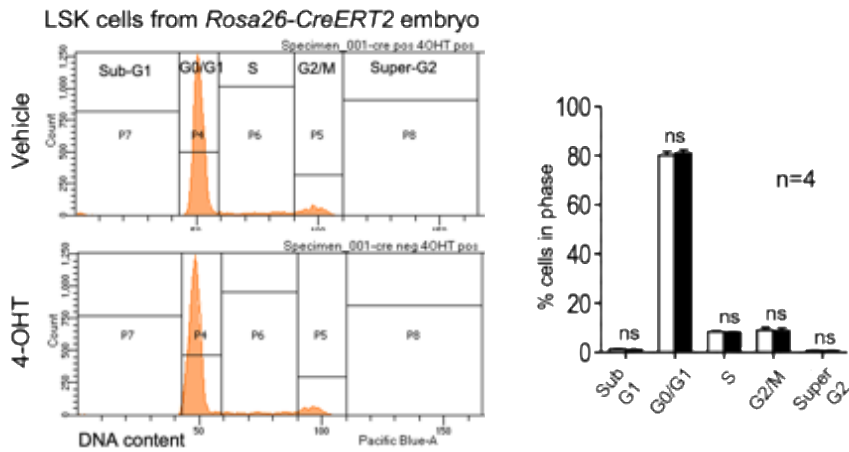

G

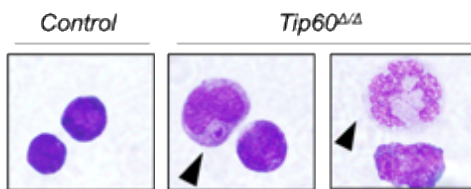

**Supplemental Figure 4 | Tip60 mutant complex integrity and morphological change after *Tip60* deletion.**

**A**, HEK293T cells were transfected with FLAG-TIP60 wild-type (*TIP60<sup>wt</sup>*), FLAG-TIP60 mutant (*TIP60<sup>mut</sup>*), or empty vector (EV) plasmid. Cells were harvested 72 hours after the transfection, whole cell lysates were immunoblotted with anti-FLAG antibody. **B**, Transduction of *TIP60<sup>wt</sup>* and *TIP60<sup>mut</sup>* was verified by Sanger sequencing of the PCR-amplified genomic products. Arrows indicate the three point-mutations corresponding to two amino acid substitutions in the acetyl CoA binding domain, resulting in lack of acetyltransferase activity. **C**, HEK293T cell lysates were used for co-immunoprecipitation using FLAG-M2 beads. Proteins present in immunoprecipitates (IP) or cell lysates of transfected cells (input) were separated by SDS-PAGE and immunoblotted with p400, FLAG, RUVBL1, and RUVBL2 antibodies. **D**, MCF10A cells were transduced with *TIP60<sup>wt</sup>*, *TIP60<sup>mut</sup>* or EV. 2 mg of whole cell lysates were used for immunoprecipitation (IP) using FLAG-M2 affinity gel overnight at 4°C. Immunoprecipitates were washed and bound proteins were eluted with 1x SDS-PAGE sample loading buffer. The proteins were subjected to mass spectrometry analysis. **E**, List of top common proteins that co-immunoprecipitated with both FLAG-TIP60 wild-type and mutant in MCF10A cells identified by IP-MS studies. **F**, Left, DNA content analysis by DAPI staining of LSK cells purified from *Rosa26-CreERT2* embryos at E14.5, treated with or without 4-hydroxytamoxifen (4-OHT) in culture for 5 days. Right, percentages of cells in each phase are graphed. The values are presented as mean  $\pm$  SEM. **G**, LSK cells were sorted from fetal liver of *Tip60<sup>fl/fl</sup>* and *Rosa26 Cre-ERT2; Tip60<sup>fl/fl</sup>* embryos (E14.5), cultured with 4-OHT for 7 days, and collected for Giemsa staining. *Tip60<sup>Δ/Δ</sup>* cells grew in size and exhibited abnormal nuclear morphology including multi-lobulated nuclei and micronuclei (arrows).

A

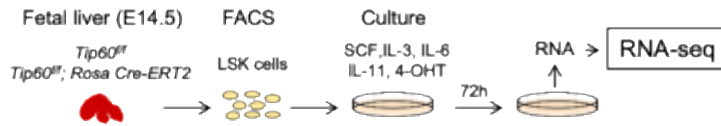

B

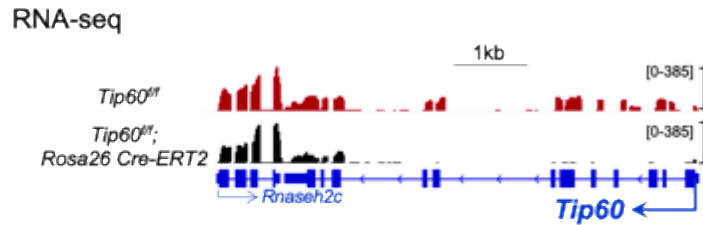

C

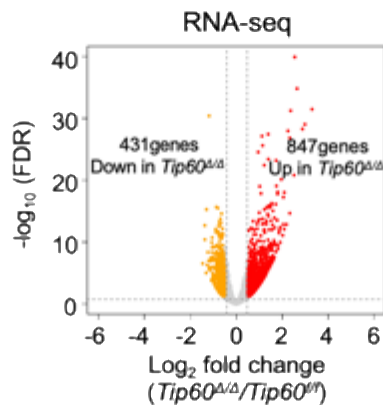

D

Enrichment in  $Tip60^{fl/fl}$

| HALLMARK gene set         | Size | NES  | FDR q-value |
|---------------------------|------|------|-------------|
| MYC_TARGETS_V1            | 175  | 3.09 | 0.000       |
| E2F_TARGETS               | 172  | 3.08 | 0.000       |
| G2M_CHECKPOINT            | 178  | 2.79 | 0.000       |
| MYC_TARGETS_V2            | 48   | 2.55 | 0.000       |
| UNFOLDED_PROTEIN_RESPONSE | 103  | 1.81 | 0.001       |
| DNA_REPAIR                | 134  | 1.70 | 0.002       |
| OXIDATIVE_PHOSPHORYLATION | 183  | 1.45 | 0.030       |
| MTORC1_SIGNALING          | 180  | 1.37 | 0.047       |
| HEME_METABOLISM           | 169  | 1.28 | 0.087       |
| FATTY_ACID_METABOLISM     | 143  | 1.12 | 0.241       |

| KEGG gene set               | Size | NES  | FDR q-value |
|-----------------------------|------|------|-------------|
| RIBOSOME                    | 83   | 3.17 | 0.000       |
| AMINOACYL_TRNA_BIOSYNTHESIS | 32   | 2.13 | 0.003       |
| DNA_REPLICATION             | 33   | 2.11 | 0.002       |
| CELL_CYCLE                  | 113  | 2.05 | 0.003       |
| MISMATCH_REPAIR             | 22   | 1.93 | 0.005       |
| HOMOLOGOUS_RECOMBINATION    | 25   | 1.74 | 0.002       |
| BASE_EXCISION_REPAIR        | 33   | 1.74 | 0.036       |
| SPLICESOME                  | 93   | 1.67 | 0.031       |
| RNA_POLYMERASE              | 27   | 1.65 | 0.050       |
| ONE_CARBON_POOL_BY_FOLATE   | 17   | 1.65 | 0.053       |

Enrichment in  $Tip60^{\Delta/\Delta}$

| HALLMARK gene set              | Size | NES   | FDR q-value |
|--------------------------------|------|-------|-------------|
| EPITHELIAL_MESENCHYMAL_TRANSIT | 187  | -2.00 | 0.000       |
| COAGULATION                    | 120  | -1.87 | 0.000       |
| MYOGENESIS                     | 194  | -1.76 | 0.002       |
| KRAS_SIGNALING_UP              | 184  | -1.73 | 0.003       |
| INFLAMMATORY_RESPONSE          | 184  | -1.71 | 0.003       |
| ANGIOGENESIS                   | 33   | -1.70 | 0.003       |
| ALLOGRAFT_REJECTION            | 174  | -1.60 | 0.011       |
| APICAL_SURFACE                 | 180  | -1.58 | 0.013       |
| TNFA_SIGNALING_VIA_NFKB        | 169  | -1.57 | 0.012       |
| HEDGEHOG_SIGNALING             | 143  | -1.56 | 0.011       |

| KEGG gene set                                | Size | NES   | FDR q-value |
|----------------------------------------------|------|-------|-------------|
| ECM_RECEPTOR_INTERACTION                     | 81   | -2.17 | 0.000       |
| AXON_GUIDANCE                                | 126  | -2.04 | 0.000       |
| METABOLISM_OF_XENOBIOTICS_BY_CYTOCHROME_P450 | 39   | -1.97 | 0.001       |
| AUTOIMMUNE_THYROID_DISEASE                   | 27   | -1.93 | 0.001       |
| CELL_ADHESION_MOLECULES_CAMS                 | 104  | -1.93 | 0.001       |
| CYTOKINE_TOKINE_RECEPTOR_INTERACTION         | 218  | -1.91 | 0.001       |
| FOCAL_ADHESION                               | 187  | -1.90 | 0.001       |
| GRAFT_VERSUS_HOST_DISEASE                    | 16   | -1.86 | 0.003       |
| INTESTINAL_IMMUNE_NETWORK_FOR_IgA_PRODUCTION | 32   | -1.71 | 0.026       |
| TYPE1_DIABETES_MELLITUS                      | 21   | -1.67 | 0.041       |



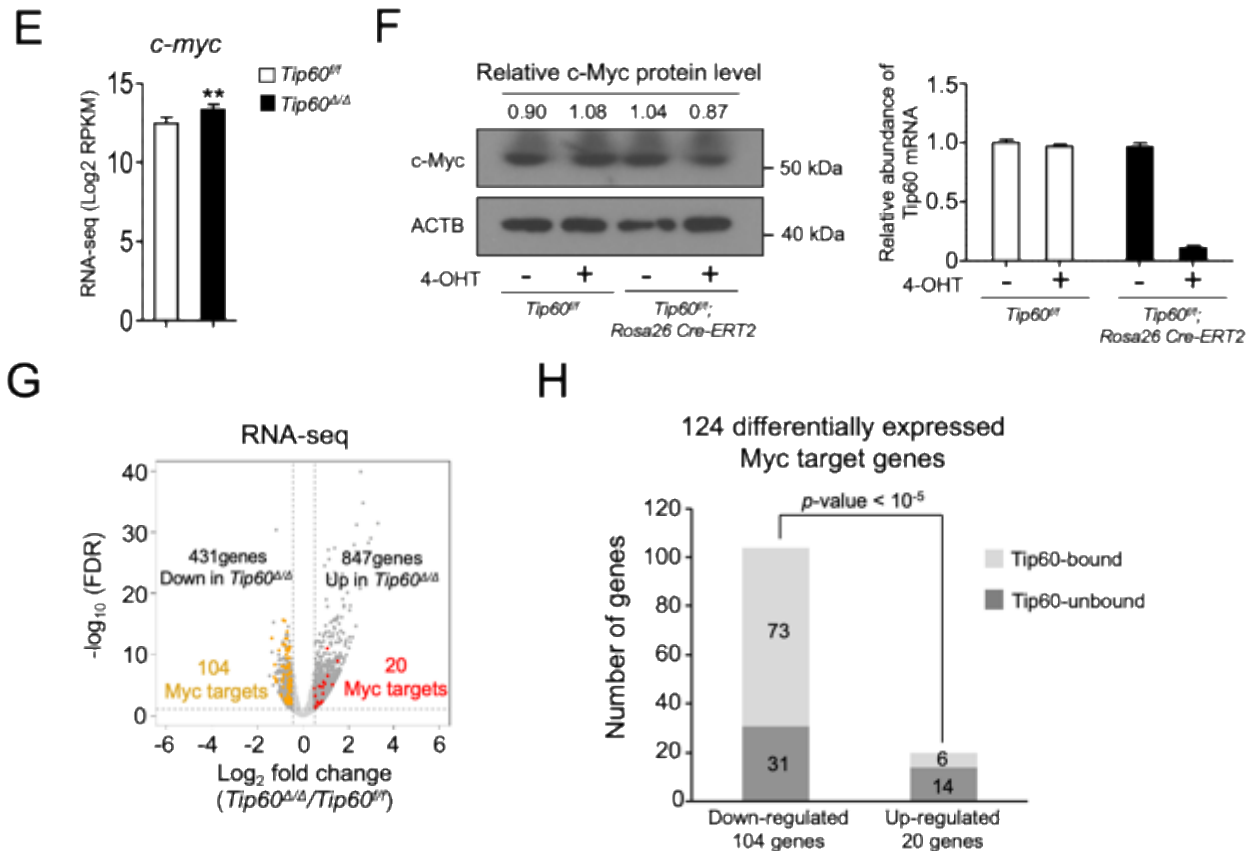

**Supplemental Figure 5 | RNA-seq analysis and c-Myc expression of *Tip60<sup>fl/fl</sup>* and *Tip60<sup>Δ/Δ</sup>* LSK cells.**

**A**, Experimental scheme for *in vitro* *Tip60* deletion in HSPC. LSK cells were purified from *Tip60<sup>fl/fl</sup>* and *Tip60<sup>fl/fl</sup>; Rosa26 Cre-ERT2* fetal liver at E14.5, cultured in media supplemented with SCF, IL-3, IL-6, IL-11, and 4-OHT for 72 hours, and harvested for analysis. **B**, Genome browser view of the *Tip60* locus obtained from RNA-seq analysis. **C**, Volcano plot showing average log<sub>2</sub> fold change against -log<sub>10</sub> FDR for all genes in *Tip60<sup>fl/fl</sup>* versus *Tip60<sup>Δ/Δ</sup>* from RNA-seq analysis. The red dots represent the significantly upregulated genes (log<sub>2</sub> fold change > 0.5 and FDR < 0.05); the orange dots represent the significantly downregulated genes (log<sub>2</sub> fold change < -0.5 and FDR < 0.05). **D**, Left, lists of enriched gene sets in *Tip60<sup>fl/fl</sup>* over *Tip60<sup>Δ/Δ</sup>* LSK cells, right, enriched gene sets in *Tip60<sup>Δ/Δ</sup>* over *Tip60<sup>fl/fl</sup>* from GSEA. **E**, RNA-seq analysis of *c-myc* expression. **F**, c-Myc protein levels measured by Western blotting (left) and Tip60 mRNA levels by qPCR (right) in Lin<sup>-</sup> c-Kit<sup>+</sup> cells purified from *Tip60<sup>fl/fl</sup>* and *Tip60<sup>fl/fl</sup>; Rosa26 Cre-ERT2* fetal liver (E14.5) after 72 hour 4-OHT treatment. **G**, Volcano plot showing average log<sub>2</sub> fold change against -log<sub>10</sub> FDR for all genes in *Tip60<sup>fl/fl</sup>* versus *Tip60<sup>Δ/Δ</sup>*. The red dots represent the significantly upregulated Myc target genes (log<sub>2</sub> fold change > 0.5 and FDR < 0.05); the orange dots represent the significantly downregulated Myc target genes (log<sub>2</sub> fold change < -0.5 and FDR < 0.05). **H**, Association between gene expression change (up-regulated vs. down-regulated) and Tip60 binding (Tip60-bound vs. unbound) in the differentially expressed Myc target genes. The values in the graph are presented as mean ± SEM. *p*-value was estimated by Fisher's exact test. \*\**p* < 0.01.

**A**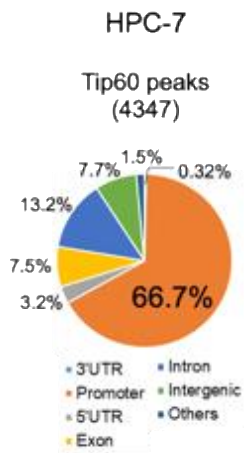**B**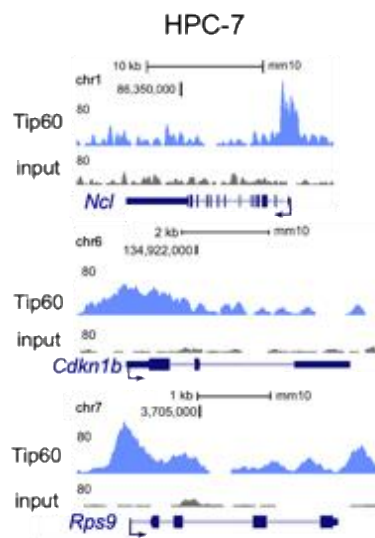**C**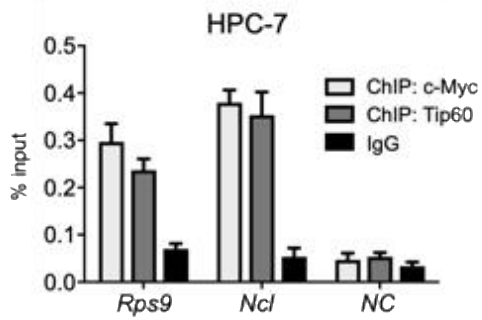**D**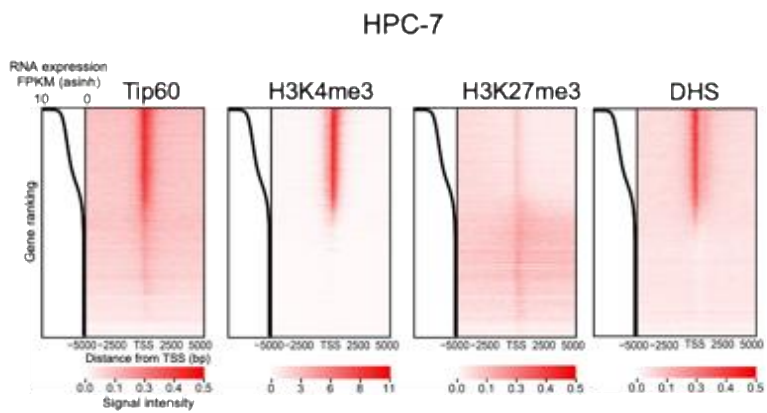

**Supplemental Figure 6 | Tip60 ChIP-seq and ChIP-qPCR in HPC-7 cells.**

**A**, Distribution of Tip60 binding peaks in HPC-7 cells relative to gene annotations. **B**, Representative Tip60 binding peaks in the previously reported Tip60 target gene loci (*Ncl*, *Cdkn1b*, and *Rps9*). **C**, c-Myc and Tip60 ChIP-qPCR in the *Rps9* and *Ncl* gene promoters in the murine multipotent progenitor cell line HPC-7 cells. Data are presented as mean  $\pm$  SD from three independent experiments. NC: control intergenic region. **D**, Heatmaps of ChIP-seq signals (Tip60, H3K4me3, and H3K27me3) and DNase I hypersensitive site (DHS) around transcriptional start sites (TSSs  $\pm$  5 kb), which are ranked according to gene expression levels after an *asinh* transformation.

**A**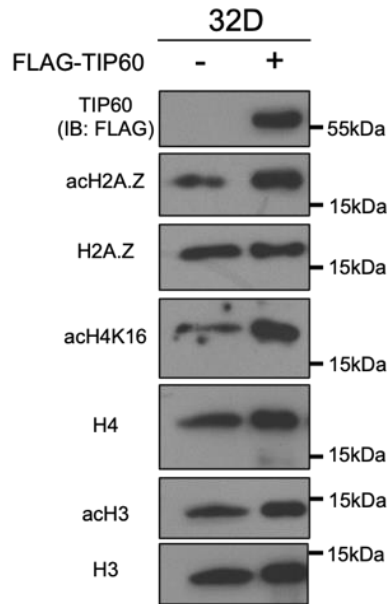**B**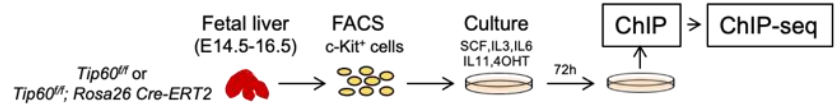**C**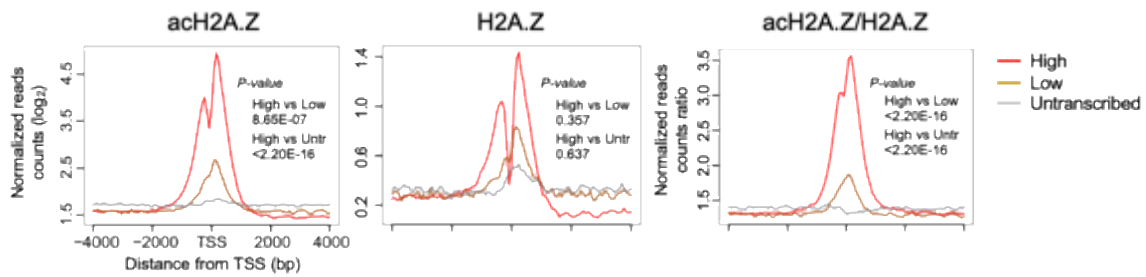

**D**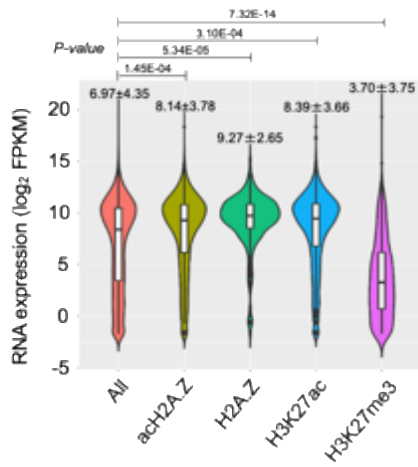**E**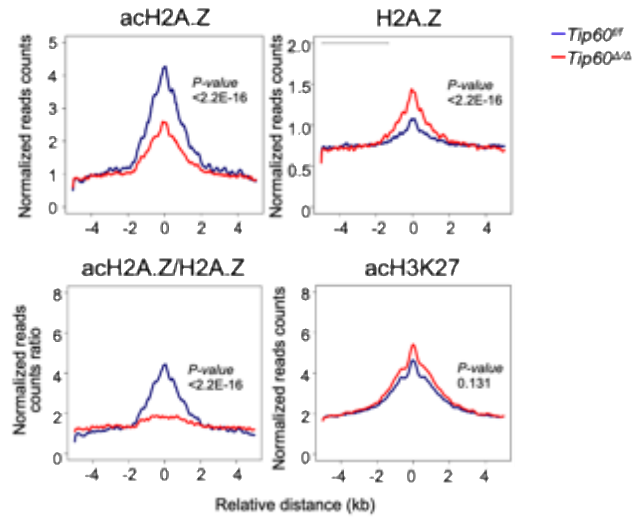**F**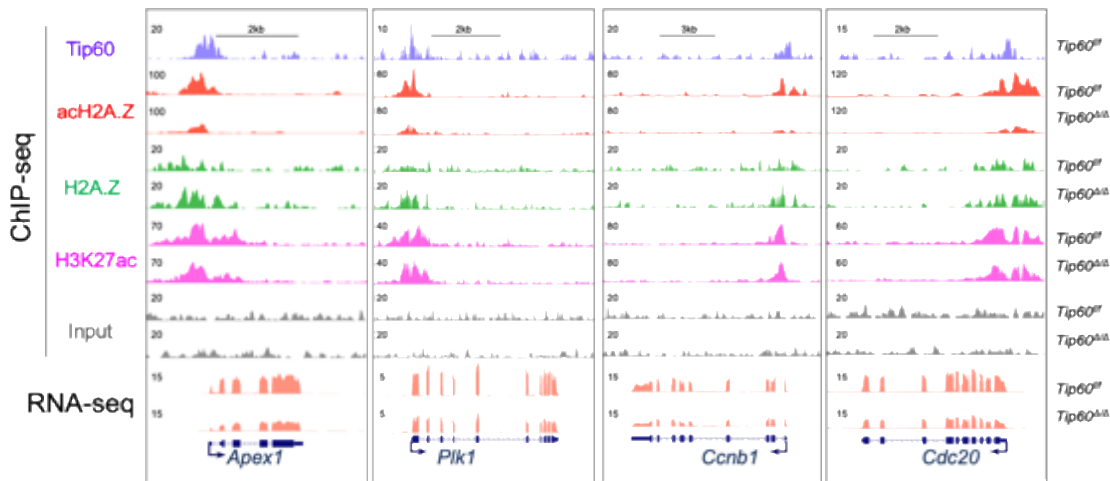**G**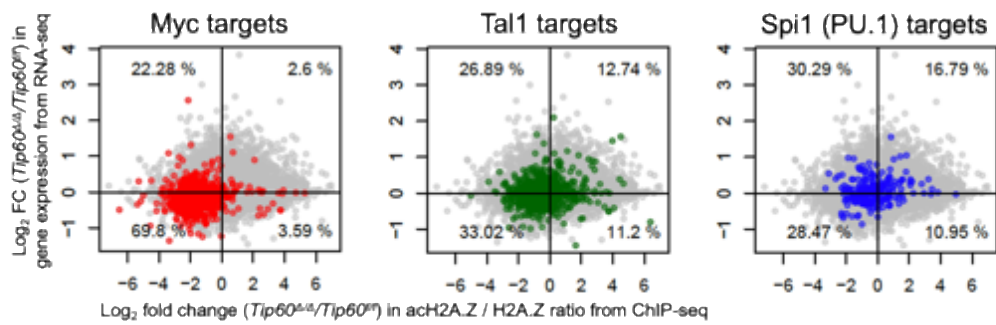

## Supplemental Figure 7 | Changes in global histone acetylation in HSPCs induced by *Tip60* deletion.

**A**, Western blot showing global histone acetylation levels in murine hematopoietic progenitor cell line 32D cells 48h after transduction of FLAG-TIP60. **B**, Experimental scheme for *in vitro* *Tip60* deletion in murine HSPCs. c-Kit<sup>+</sup> cells were purified from fetal liver of *Tip60<sup>fl/fl</sup>* and *Tip60<sup>fl/fl</sup>; Rosa26 Cre-ERT2* embryos by FACS, cultured in media supplemented with SCF, IL-3, IL-6, IL-11, and 4-OHT for 72 hours, and harvested for analysis. **C**, Mean-plot for H2A.Z (left), acH2A.Z (middle), and acH2A.Z/H2A.Z ratio (right) enrichment around TSSs ( $\pm 4$ kb). Genes were split into three groups according to RNA expression level: red, high with  $\log_2$  expression (FPKM) $>7$ , 10467 genes; brown, low with  $0.02 < \log_2$  expression (FPKM)  $\leq 7$ , 5630 genes; gray, untranscribed with  $\log_2$  expression (FPKM)  $< 0.02$ , 8013 genes. The average signal intensity of the specific group is plotted. *p*-value was estimated by Mann-Whitney-Wilcoxon method. **D**, Violin plots showing the gene expression distributions in *Tip60<sup>fl/fl</sup>* fetal LSK cells from RNA-seq for all genes (24,110 genes) and genes enriched with peaks for acH2A.Z (1,426 genes), H2A.Z (985 genes), H3K27ac (1,300 genes) and H3K27me3 (5,521 genes) around TSS ( $\pm 4$ kb) obtained from the ChIP-seq analysis of *Tip60<sup>fl/fl</sup>* fetal c-Kit<sup>+</sup> cells. Corresponding boxplot represents mean and the 25<sup>th</sup> to 75<sup>th</sup> percentiles of the distribution. Mean expression levels ( $\log_2$  FPKM)  $\pm$  SD are indicated. *p*-value was estimated by Mann-Whitney-Wilcoxon method. **E**, Mean-plot of acH2A.Z, H2A.Z, the acH2A.Z/H2A.Z ratio, and acH3K27 at *Tip60*-bound distal enhancer regions. The X axis presents the relative distance to *Tip60* peaks, while the Y axis presents the normalized reads counts/reads counts ratio (for acH2A.Z/H2A.Z) in both control (dark blue) and *Tip60<sup>fl/fl</sup>* fetal c-Kit<sup>+</sup> cells (red). *p*-value was estimated by Mann-Whitney-Wilcoxon method. **F**, ChIP-seq (*Tip60*, acH2A.Z, H2A.Z, and H3K27ac) and RNA-seq peak of both control (*Tip60<sup>fl/fl</sup>*) and *Tip60<sup>fl/fl</sup>* cells at the representatives of the selected Myc target genes (*Apex1*, *Plk1*, *Ccnb1*, and *Cdc20*). **G**,  $\log_2$  fold change in acH2A.Z/H2A.Z ratio at promoter regions (X-axis) from ChIP-seq and  $\log_2$  fold change in gene expression level (Y-axis) of Myc target genes (red), *Tal1* (green), *Spi1* (PU.1) (blue), and whole genes (grey) from RNA-seq. Myc, *Tal1*, and *Spi1* (PU.1) target genes were obtained from the gene sets described in Figure 5A, ENCSR000DIA, and GSE58128, respectively.

## Reference

1. Fisher JB, Horst A, Wan T, et al. Depletion of *Tip60* from In Vivo Cardiomyocytes Increases Myocyte Density, Followed by Cardiac Dysfunction, Myocyte Fallout and Lethality. *PLoS One*. 2016;11(10):e0164855.
2. de Boer J, Williams A, Skavdis G, et al. Transgenic mice with hematopoietic and lymphoid specific expression of *Cre*. *Eur J Immunol*. 2003;33(2):314-325.
3. Pinto do OP, Kolterud A, Carlsson L. Expression of the LIM-homeobox gene *LH2* generates immortalized steel factor-dependent multipotent hematopoietic precursors. *EMBO J*. 1998;17(19):5744-5756.
4. Ikura T, Ogryzko VV, Grigoriev M, et al. Involvement of the TIP60 histone acetylase complex in DNA repair and apoptosis. *Cell*. 2000;102(4):463-473.
5. Jha S, Shibata E, Dutta A. Human *Rvb1/Tip49* is required for the histone acetyltransferase activity of *Tip60/NuA4* and for the downregulation of phosphorylation on H2AX after DNA damage. *Mol Cell Biol*. 2008;28(8):2690-2700.
6. Frank SR, Parisi T, Taubert S, et al. MYC recruits the TIP60 histone acetyltransferase complex to chromatin. *EMBO Rep*. 2003;4(6):575-580.
